# Supplementary material for: Synthesis of NaBH4 as a hydrogen carrier from hydrated borax using a Mg–Al alloy
Source: Royal Society of Chemistry journal article supplement (doi:10.1039/d1qi01247a), 2021-11-23
Supplement: d1qi01247a1.pdf [file d1qi01247a1.pdf]

## Supporting Information of

### Synthesis of $\text{NaBH}_4$ as a hydrogen carrier from hydrated borax using a Mg-Al alloy

Yongyang Zhu,<sup>a</sup> Hao Zhong,<sup>a</sup> Liuzhang Ouyang,<sup>\*ab</sup> Jiangwen Liu,<sup>a</sup> Hui Wang,<sup>a</sup>

Huaiyu Shao,<sup>\*c</sup> and Min Zhu<sup>a</sup>

a: School of Materials Science and Engineering, Guangdong Provincial Key Laboratory of Advanced Energy Storage Materials, South China University of Technology, Guangzhou, 510641, People's Republic of China.

b: China-Australia Joint Laboratory for Energy & Environmental Materials, Key Laboratory of Fuel Cell Technology of Guangdong Province, Guangzhou, 510641, People's Republic of China.

c: Guangdong-Hong Kong-Macau Joint Laboratory for Photonic-Thermal-Electrical Energy Materials and Devices, Institute of Applied Physics and Materials Engineering (IAPME), Department of Physics and Chemistry, Faculty of Science and Technology, University of Macau, Macau SAR, China.

\* Author to whom correspondence should be addressed.

Liuzhang Ouyang, E-mail address: [meouyang@scut.edu.cn](mailto:meouyang@scut.edu.cn) Tel: 86-20-87114253, Fax: 86-20-87114253 and Huaiyu Shao ([hshao@um.edu.mo](mailto:hshao@um.edu.mo))

## Table of Contents

|                          |      |
|--------------------------|------|
| Table of Contents .....  | S-2  |
| Supplementary Data ..... | S-3  |
| Figure S1 .....          | S-3  |
| Figure S2 .....          | S-4  |
| Figure S3 .....          | S-5  |
| Figure S4 .....          | S-6  |
| Figure S5 .....          | S-7  |
| Figure S6 .....          | S-8  |
| Figure S7 .....          | S-9  |
| Figure S8 .....          | S-10 |
| Table S1 .....           | S-12 |
| Table S2 .....           | S-13 |
| Table S3 .....           | S-14 |
| References .....         | S-15 |

## Supplementary Data

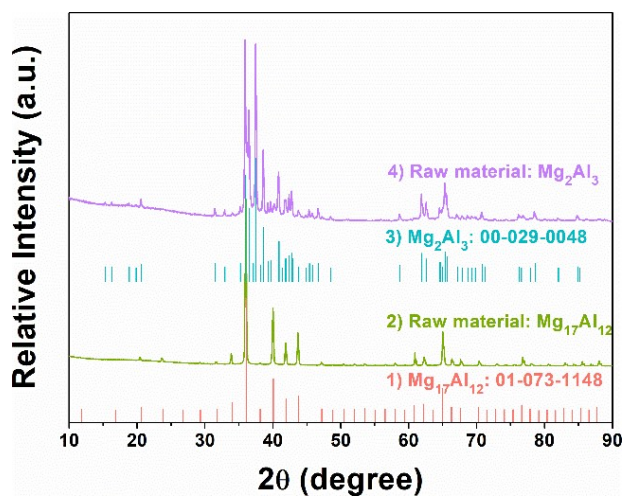

**Figure S1.** (a) XRD patterns of 1) standard PDF card of  $Mg_{17}Al_{12}$ , 2) raw  $Mg_{17}Al_{12}$ , 3) standard PDF card of  $Mg_2Al_3$ , and 4) raw  $Mg_2Al_3$ .

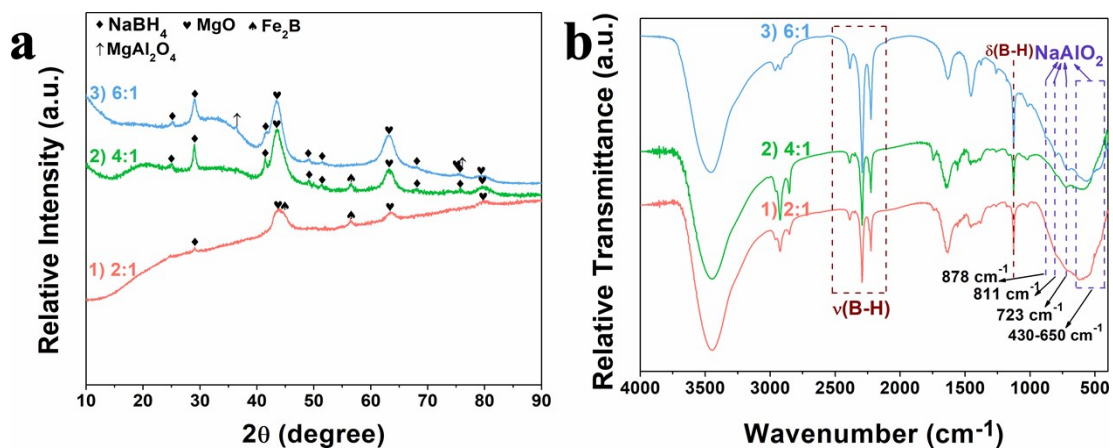

**Figure S2.** (a) XRD patterns and (b) FTIR spectra of products obtained after milling NaH and  $\text{Na}_2\text{B}_4\text{O}_7 \cdot 10\text{H}_2\text{O}$  in different molar ratios for 20 h ( $\text{Na}_2\text{B}_4\text{O}_7 \cdot 10\text{H}_2\text{O}$  and  $\text{Mg}_{17}\text{Al}_{12}$  were fixed at 1:0.607). In Figure S2b, IR band at  $811\text{ cm}^{-1}$  corresponds to the formation of O-O triangular species bonds and the bands at  $617$  and  $558\text{ cm}^{-1}$  belong to the vibrations of Al-O bond in  $\text{NaAlO}_2$  [1, 2].

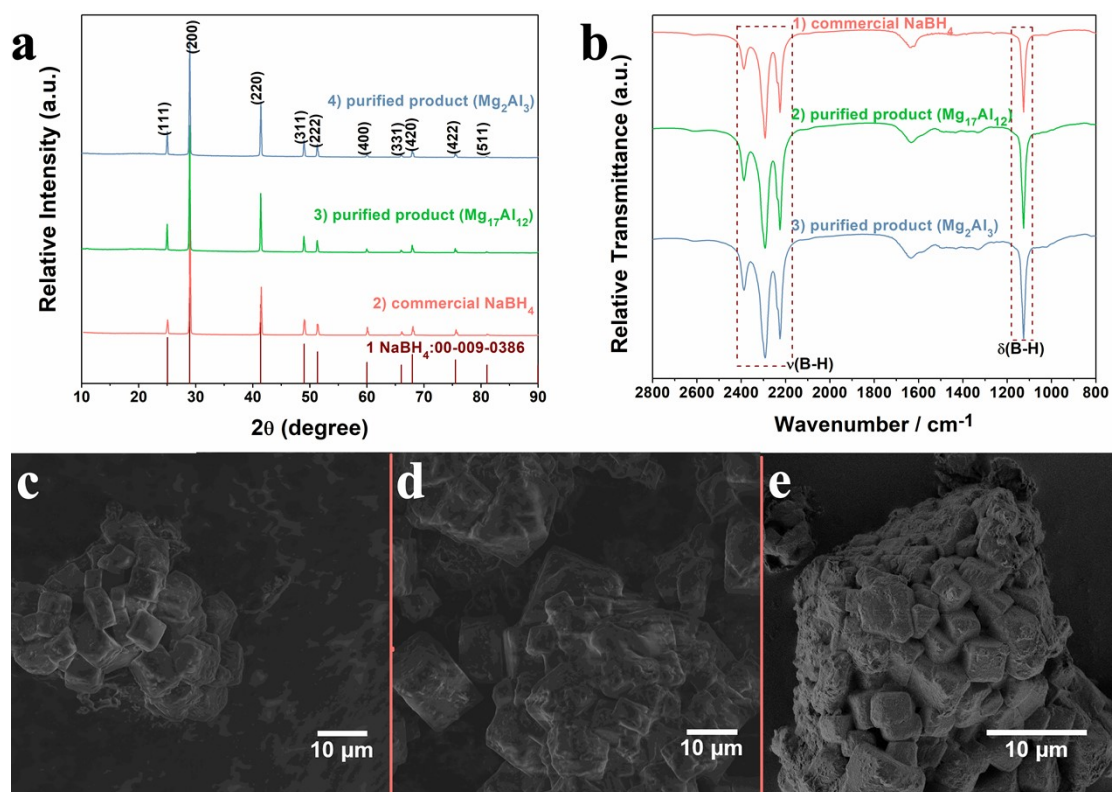

**Figure S3.** (a) XRD patterns of standard PDF card of NaBH<sub>4</sub>, commercial NaBH<sub>4</sub> and purified product; (b) FTIR spectra of commercial NaBH<sub>4</sub> and purified product; SEM images of (c) purified product by using Mg<sub>17</sub>Al<sub>12</sub> as reducing agent, (d) purified product by using Mg<sub>2</sub>Al<sub>3</sub>, and (e) commercial NaBH<sub>4</sub>.

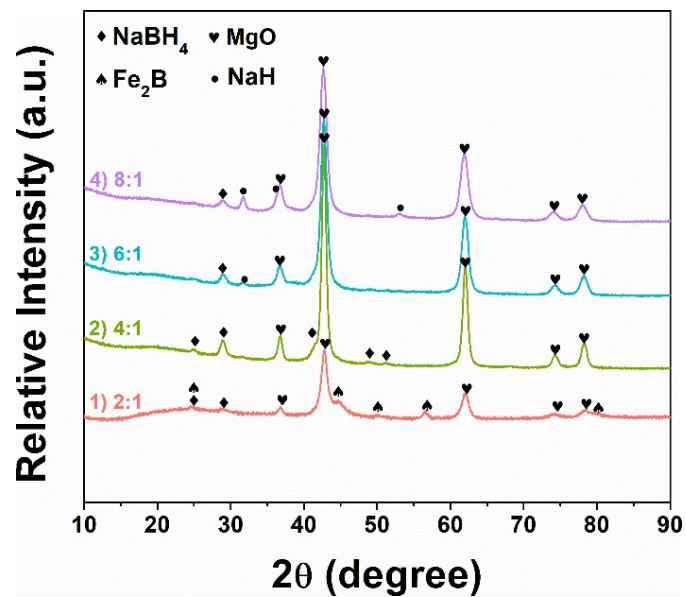

**Figure S4.** XRD patterns of products obtained after milling NaH and Na<sub>2</sub>B<sub>4</sub>O<sub>7</sub>·10H<sub>2</sub>O in different molar ratios for 20 h (Na<sub>2</sub>B<sub>4</sub>O<sub>7</sub>·10H<sub>2</sub>O and Mg were fixed at 1:21.25).

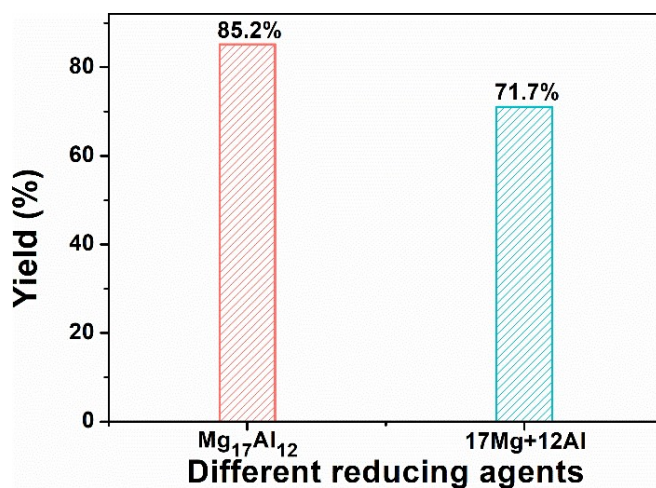

**Figure S5.** Yields of NaBH<sub>4</sub> of the products obtained after milling Na<sub>2</sub>B<sub>4</sub>O<sub>7</sub>·10H<sub>2</sub>O, NaH, and Mg<sub>17</sub>Al<sub>12</sub>/(17Mg+12Al) mixtures (in 1:4:0.850 molar ratio) for 20 h at 1200 CPM.

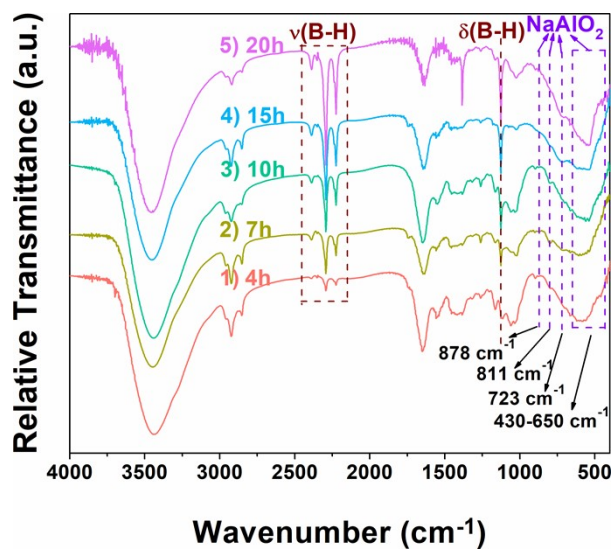

**Figure S6.** FTIR spectra of products obtained via ball milling  $\text{Mg}_{17}\text{Al}_{12}$ ,  $\text{Na}_2\text{B}_4\text{O}_7 \cdot 10\text{H}_2\text{O}$ , and NaH in a molar ratio of 0.850:1:4 at 1200 CPM for different durations.



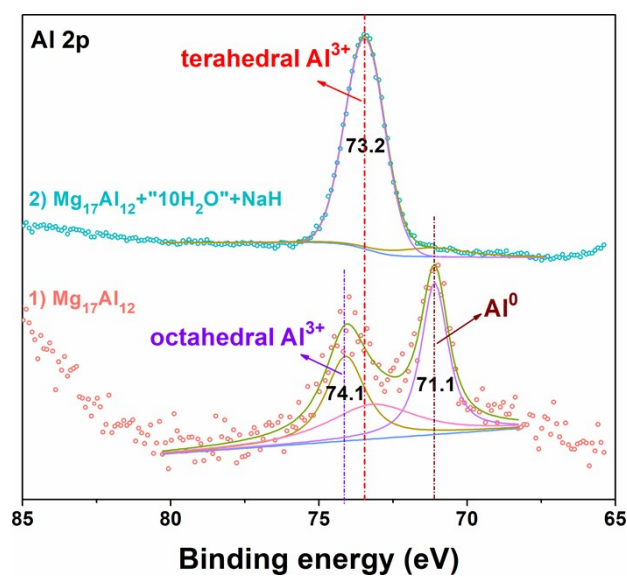

**Figure S7.** XPS of 1) raw commercial Mg<sub>17</sub>Al<sub>12</sub> after milling 10 h at 1200 CPM and 2) products obtained after milling Mg<sub>17</sub>Al<sub>12</sub>, NaH, and Na<sub>2</sub>B<sub>4</sub>O<sub>7</sub>·10H<sub>2</sub>O in a molar ratio of 0.486:4:1 for 10 h at 1200 CPM.

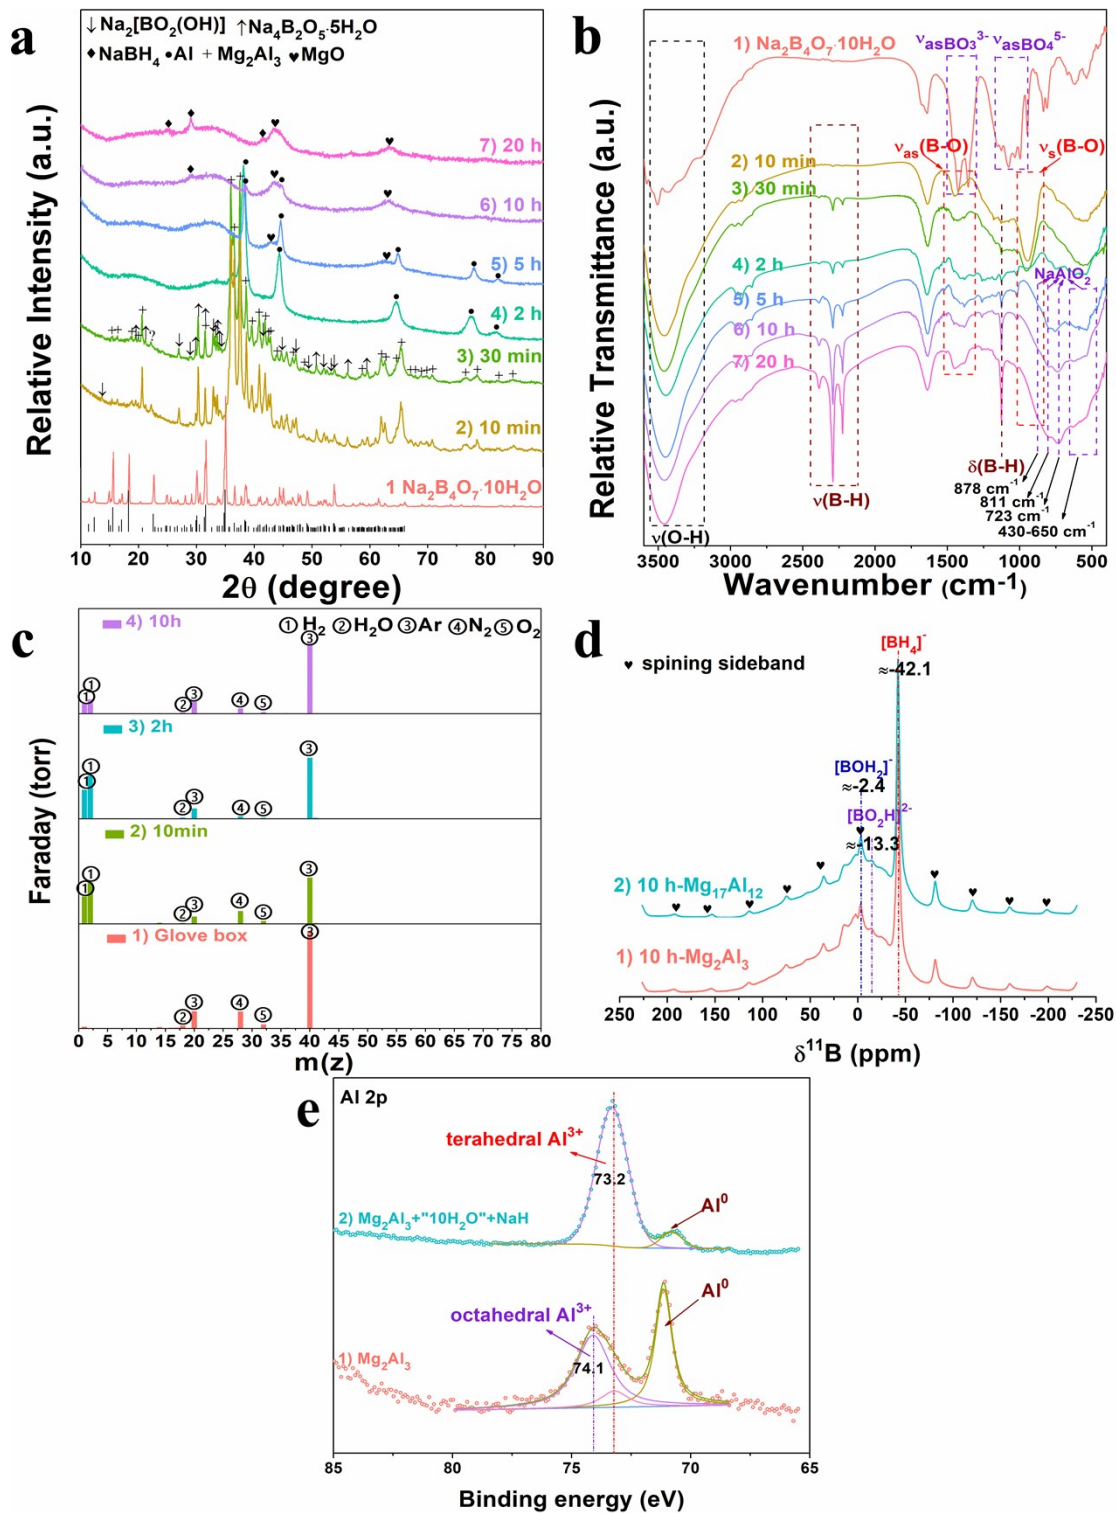

**Figure S8.** (a) XRD patterns and (b) FTIR spectra of 1) raw Na<sub>2</sub>B<sub>4</sub>O<sub>7</sub>·10H<sub>2</sub>O; products obtained after ball milling Mg<sub>2</sub>Al<sub>3</sub>, NaH, and Na<sub>2</sub>B<sub>4</sub>O<sub>7</sub>·10H<sub>2</sub>O mixtures (in a 2.62:4:1 molar ratio) with different durations at 1200 CPM; (c) MS of the gaseous sample obtained after ball milling Mg<sub>2</sub>Al<sub>3</sub>, NaH, and Na<sub>2</sub>B<sub>4</sub>O<sub>7</sub>·10H<sub>2</sub>O mixtures (in a 2.62:4:1

molar ratio) with different durations at 1200 CPM; (d) solid-state  $^{11}\text{B}$  NMR spectra of products obtained 1) after milling  $\text{Mg}_2\text{Al}_3$ ,  $\text{NaH}$ , and  $\text{Na}_2\text{B}_4\text{O}_7 \cdot 10\text{H}_2\text{O}$  in a molar ratio of 2.62:4:1 for 10 h at 1200 CPM and 2) after milling  $\text{Mg}_{17}\text{Al}_{12}$ ,  $\text{NaH}$ , and  $\text{Na}_2\text{B}_4\text{O}_7 \cdot 10\text{H}_2\text{O}$  in a molar ratio of 0.486:4:1 for 10 h at 1200 CPM; (e) XPS of 1) raw  $\text{Mg}_2\text{Al}_3$  after milling 5 h at 1200 CPM and 2) products obtained after milling  $\text{Mg}_2\text{Al}_3$ ,  $\text{NaH}$ , and  $\text{Na}_2\text{B}_4\text{O}_7 \cdot 10\text{H}_2\text{O}$  in a molar ratio of 2.62:4:1 for 5 h at 1200 CPM.

**Table S1.** EDS results of products obtained after ball milling NaH and Na<sub>2</sub>B<sub>4</sub>O<sub>7</sub>·10H<sub>2</sub>O (“10H<sub>2</sub>O”) in different molar ratios for 20 h.

|                           | Al: “10H <sub>2</sub> O” |          | Mg: “10H <sub>2</sub> O” |         | Mg <sub>17</sub> Al <sub>12</sub> : “10H <sub>2</sub> O” |         |
|---------------------------|--------------------------|----------|--------------------------|---------|----------------------------------------------------------|---------|
| NaH: “10H <sub>2</sub> O” | (14.16:1)                |          | (21.25:1)                |         | (0.607:1)                                                |         |
|                           | Fe (wt%)                 | Cr (wt%) | Fe(wt%)                  | Cr(wt%) | Fe(wt%)                                                  | Cr(wt%) |
| 2:1                       | 24.34                    | 0.85     | 16.94                    | 0.74    | 27.87                                                    | 0.54    |
| 4:1                       | 20.91                    | 0.44     | 2.30                     | 0.11    | 9.05                                                     | 0.14    |
| 6:1                       | 9.62                     | 0.25     | 1.48                     | 0.06    | 0.54                                                     | 0.03    |
| 8:1                       | 4.86                     | 0.14     | 0.81                     | 0.11    |                                                          |         |

**Table S2.** Yields of NaBH<sub>4</sub> synthesized by various methods.

| Reactants                                                                                                               | Method and conditions                                                            | Max yield (%)           |
|-------------------------------------------------------------------------------------------------------------------------|----------------------------------------------------------------------------------|-------------------------|
| NaBO <sub>2</sub> :Mg (1:2)                                                                                             | anneal at 550°C, 7 MPa H <sub>2</sub>                                            | 10 [3]                  |
| NaBO <sub>2</sub> ·2H <sub>2</sub> O:Mg (1:4)                                                                           | anneal at 600°C, 3 MPa H <sub>2</sub>                                            | 12.3 [4]                |
| Na <sub>2</sub> B <sub>4</sub> O <sub>7</sub> :Mg (1:16)                                                                | anneal at 550°C, 25 bar H <sub>2</sub>                                           | 46.5 <sup>[a]</sup> [5] |
| Na <sub>2</sub> B <sub>4</sub> O <sub>7</sub> :MgH <sub>2</sub> (1:9.5)                                                 | planetary ball 2750 rpm, 1 h, 1 atm Ar                                           | 43 [6]                  |
| Na <sub>2</sub> B <sub>4</sub> O <sub>7</sub> :NaOH:MgH <sub>2</sub> (1:2:8)                                            | planetary ball 2750 rpm, 1 h, 1 atm Ar                                           | 64 [6]                  |
| Na <sub>2</sub> B <sub>4</sub> O <sub>7</sub> :Na <sub>2</sub> O <sub>2</sub> :MgH <sub>2</sub><br>(1:1:9.24)           | planetary ball 2750 rpm, 1 h, 1 atm Ar                                           | 67 [6]                  |
| Na <sub>2</sub> B <sub>4</sub> O <sub>7</sub> :Na <sub>2</sub> CO <sub>3</sub> :MgH <sub>2</sub><br>(1:1:9.24)          | planetary ball 2750 rpm, 1 h, 1 atm Ar                                           | 78 [6]                  |
| NaBO <sub>2</sub> :MgH <sub>2</sub> (1:2.8)                                                                             | shaker mill 1080 cpm, 6 h, 1 atm Ar                                              | 76 [7]                  |
| NaBO <sub>2</sub> :MgH <sub>2</sub> (1:2.6)                                                                             | shaker mill 1080 cpm, 11 h, 1 atm Ar                                             | 70 [8]                  |
| NaBO <sub>2</sub> :MgH <sub>2</sub> (1:2.07)                                                                            | shaker mill 1230 cpm, 2 h, 200 kPa Ar                                            | 71 [9]                  |
| NaBO <sub>2</sub> :MgH <sub>2</sub> (1:2.7)                                                                             | shaker mill 1200 cpm, 12 h, 3 MPa H <sub>2</sub> ,<br>0.15 mL CH <sub>3</sub> OH | 89 [10]                 |
| Na:B <sub>2</sub> O <sub>3</sub> :MgH <sub>2</sub> (2:1.2:5.2)                                                          | shaker mill 1080 cpm, 11 h, 1 atm Ar                                             | 25 [11]                 |
| NaBO <sub>2</sub> ·2H <sub>2</sub> O:MgH <sub>2</sub> (1:5)                                                             | shaker mill 1200 cpm, 15 h, 1 atm Ar                                             | 90.0 [12]               |
| NaBO <sub>2</sub> ·2H <sub>2</sub> O:Mg (1:5)                                                                           | shaker mill 1200 cpm, 15 h, 1 atm Ar                                             | 68.55 [13]              |
| Na <sub>2</sub> B <sub>4</sub> O <sub>7</sub> ·10H <sub>2</sub> O:Na <sub>2</sub> CO <sub>3</sub> :Mg<br>(1:1:24.75)    | shaker mill 1000 cpm, 30 h, 1 atm Ar                                             | 78.9 [14]               |
| Na <sub>2</sub> B <sub>4</sub> O <sub>7</sub> ·10H <sub>2</sub> O:NaH:Mg <sub>17</sub> Al <sub>1</sub><br>2 (1:4:0.850) | shaker mill 1200 cpm, 20 h, 1 atm Ar                                             | 85.2 (in this<br>work)  |

[a] The yield was determined according to the following equation:

$$\text{Yield (NaBH}_4\text{)} = \frac{\text{obtained mass NaBH}_4}{\text{theoretical mass NaBH}_4} \times 100\%$$

The theoretical amount was based on a full conversion meaning that 1 mole Na<sub>2</sub>B<sub>4</sub>O<sub>7</sub> is converted to 4 mole of NaBH<sub>4</sub>.

**Table S3.** Cost of raw materials

| Method                                                                                                             | Cost (US\$/ ton)      |
|--------------------------------------------------------------------------------------------------------------------|-----------------------|
| Ball milling $\text{Mg}_{17}\text{Al}_{12}$ , NaH, and $\text{Na}_2\text{B}_4\text{O}_7 \cdot 5\text{H}_2\text{O}$ | 15,027 <sup>a)</sup>  |
| Ball milling $\text{MgH}_2$ and $\text{NaBO}_2$                                                                    | 280670 <sup>b)</sup>  |
| Ball milling $\text{MgH}_2$ , $\text{Na}_2\text{CO}_3$ , and $\text{Na}_2\text{B}_4\text{O}_7$                     | 262,015 <sup>c)</sup> |

The calculation does not include the cost of raw materials  $\text{Na}_2\text{B}_4\text{O}_7$ ,  $\text{NaBO}_2$  or  $\text{Na}_2\text{B}_4\text{O}_7 \cdot 10\text{H}_2\text{O}$ , since they can be easily recycled from hydrolytic product of  $\text{NaBH}_4$  or obtained from borax mineral. All the prices of raw materials are from a commercial company.

<sup>a)</sup> The calculation is based on the highest yield of 85.2% obtained via ball milling  $\text{Mg}_{17}\text{Al}_{12}$ , NaH, and  $\text{Na}_2\text{B}_4\text{O}_7 \cdot 5\text{H}_2\text{O}$  mixtures (in 0.850:4:1 molar ratio). 4.86 tons of  $\text{Mg}_{17}\text{Al}_{12}$  and 0.74 tons of NaH are needed to produce 1 ton  $\text{NaBH}_4$ . For the price, it is \$2,420/ton for  $\text{Mg}_{17}\text{Al}_{12}$  and \$4413/ton for NaH. Then the total cost of raw materials is \$15,027;

<sup>b)</sup> The calculation is based on the highest yield of 63% obtained via ball milling  $\text{MgH}_2$  and  $\text{NaBO}_2$  mixtures (in 2:1 molar ratio) [7]. 2.21 tons of  $\text{MgH}_2$  are needed to produce 1 ton of  $\text{NaBH}_4$ . For the price, it is \$127,000/ton for  $\text{MgH}_2$ . The total cost of raw materials is \$280,670;

<sup>c)</sup> The calculation is based on a 78% yield when  $\text{MgH}_2$ ,  $\text{Na}_2\text{CO}_3$ , and  $\text{Na}_2\text{B}_4\text{O}_7$  with a ratio of 9.24:1:1 is ball milled for 1 h [6]. 2.061 tons of  $\text{MgH}_2$  and 0.898 tons of  $\text{Na}_2\text{CO}_3$  are needed to produce 1 ton  $\text{NaBH}_4$ . The price of  $\text{Na}_2\text{CO}_3$  is \$298, so the total cost of raw materials is \$262,015.

## References

- [1] S. Lou, L. Jia, X. Guo, W. Wu, L. Gao, H. Wu, et al. *RSC Adv.* **2016**, 6, 6921-6923.
- [2] T. Wan, P. Yu, S. Wang, Y. Luo, *Energy Fuels* **2009**, 23, 1089-1092.
- [3] Y. Kojima, T. Haga, *Int. J. Hydrogen Energy* **2003**, 28, 989-993.
- [4] B. H. Liu, Z. P. Li, J. K. Zhu, *J. Alloys Compd.* **2009**, 476, L16-L20.
- [5] İ. Kayacan, Ö. M. Doğan, B. Z. Uysal, *Int. J. Hydrogen Energy* **2011**, 36, 7410-7415.
- [6] Z. P. Li, N. Morigazaki, B. H. Liu, S. Suda, *J. Alloys Compd.* **2003**, 349, 232-236.
- [7] C. L. Hsueh, C. H. Liu, B. H. Chen, C. Y. Chen, Y. C. Kuo, K. J. Hwang, J. R. Ku, *Int. J. Hydrogen Energy* **2009**, 34, 1717-1725.
- [8] Ç. Çetin, G. Metin, *Renew. Energy* **2010**, 35, 1895-1899 .
- [9] L. Kong, X. Cui, H. Jin, J. Wu, H. Du, T. Xiong, *Energy Fuels* **2009**, 23, 5049-5054.
- [10] C. Lang, Y. Jia, J. Liu, H. Wang, L. Ouyang, M. Zhu, X. Yao, *Int. J. Hydrogen Energy* **2017**, 42, 13127-13135.
- [11] Ç. Çakanyildirim, M. Gürü, *Energy Sources, Part A Recovery, Util. Environ. Eff.* **2011** 33, 1912-1920.
- [12] W. Chen, L. Z. Ouyang, J. W. Liu, X. D. Yao, H. Wang, Z. W. Liu, M. Zhu, *J. Power Sources* **2017**, 359, 400-407.
- [13] L. Ouyang, W. Chen, J. Liu, M. Felderhoff, H. Wang, M. Zhu, *Adv. Energy Mater.* **2017**, 7, 1700299.
- [14] Y. Y. Zhu, L. Z. Ouyang, H. Zhong, H. Wang, H. Y. Shao, Z. G. Huang, Zhu. M,

*Angew. Chem. Int. Ed.* **2020**, *59*, 8623-8629.
